# Supplementary material
Source: MDPI journal article supplement (https://www.mdpi.com/2673-4931/19/1/36)
Supplement: s1 [file s1]

## Supplementary Materials

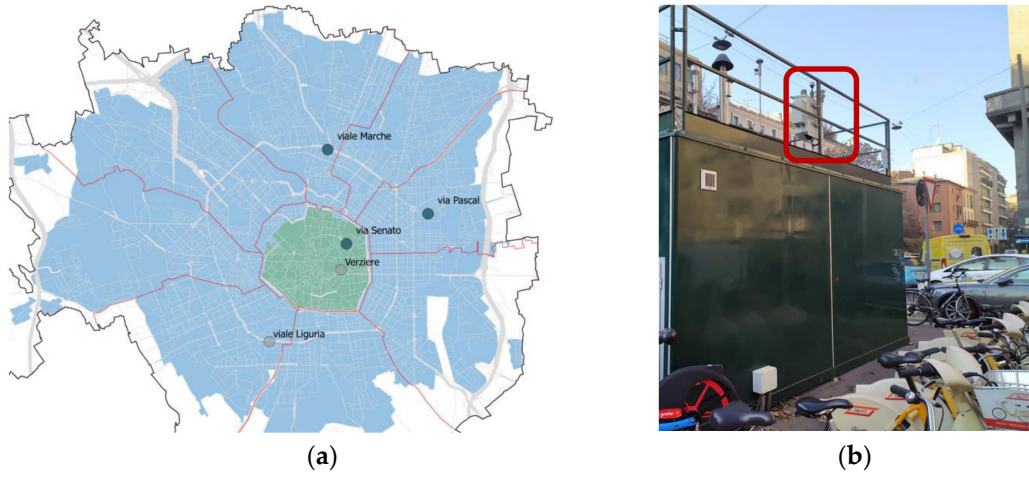

**Figure S1.** Assessment of near reference sensors stations. (a) Monitors' geographical location, represented as blue dots either within the 'Area C' Congestions Charge Zone (green area) or the 'Area B' Low Emission Zone (blue area); (b) Collocation of the near reference monitor (within the red rectangle), with the via Senato reference monitor station.
